# Supplementary material for: CFH and VIPR2 as susceptibility loci in choroidal thickness and pachychoroid disease central serous chorioretinopathy
Source: PubMed Central journal article supplement — Proc Natl Acad Sci U S A. 2018 May 29;115(24):6261–6. doi: 10.1073/pnas.1802212115 (PMC6004488; doi:10.1073/pnas.1802212115), 2018-05-29
Supplement: pnas.1802212115.sapp.pdf [file pnas.1802212115.sapp.pdf]

**Supplementary Figure 1: Quantile-quantile (QQ) plots from the discovery stage.** QQ plots for association between all analyzed single nucleotide polymorphisms and choroidal thickness in the discovery stage. Each blue dot represents an observed statistic (defined as the  $-\log_{10}(P\text{-value})$ ) versus the corresponding expected statistic before genomic control, whereas each red dot represents the observed statistic versus the corresponding expected statistic after genomic control. The black line corresponds to the null distribution.

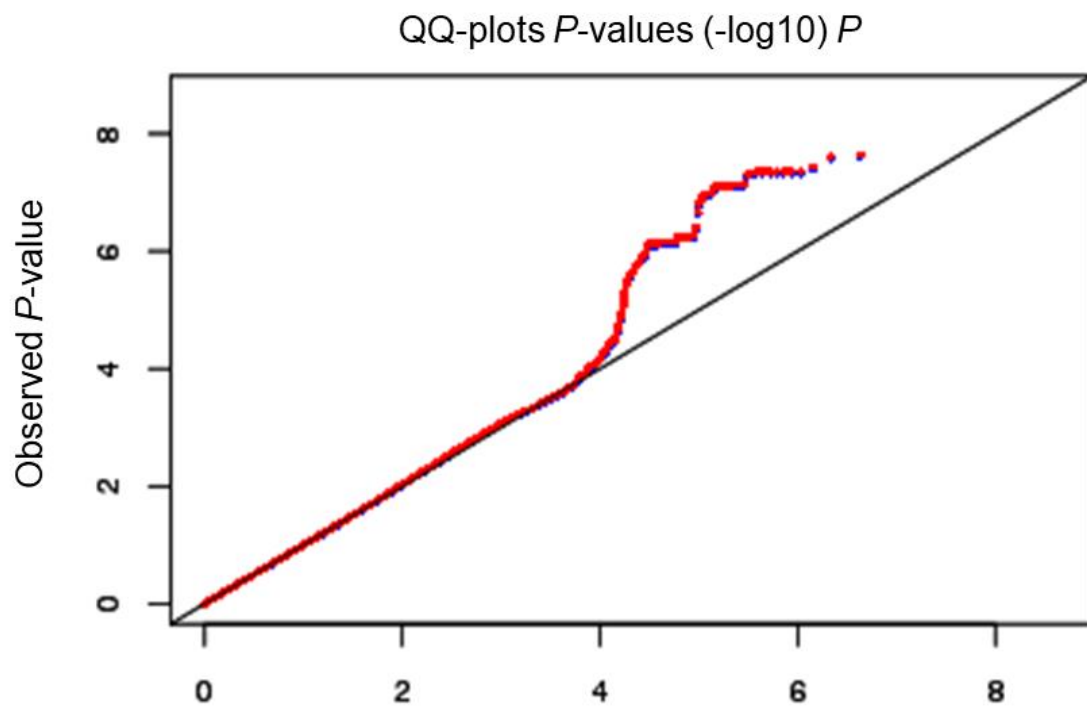

**Supplementary Figure 2: Regional association plots for genotyped single nucleotide polymorphisms in the *NR3C2* region.** Plots represented using the  $-\log_{10}(P\text{-values})$  obtained from the first-stage genome-wide association study. Each  $P$ -value was calculated by age-, sex-, axial length and the first principal component-adjusted quantitative trait locus analysis.

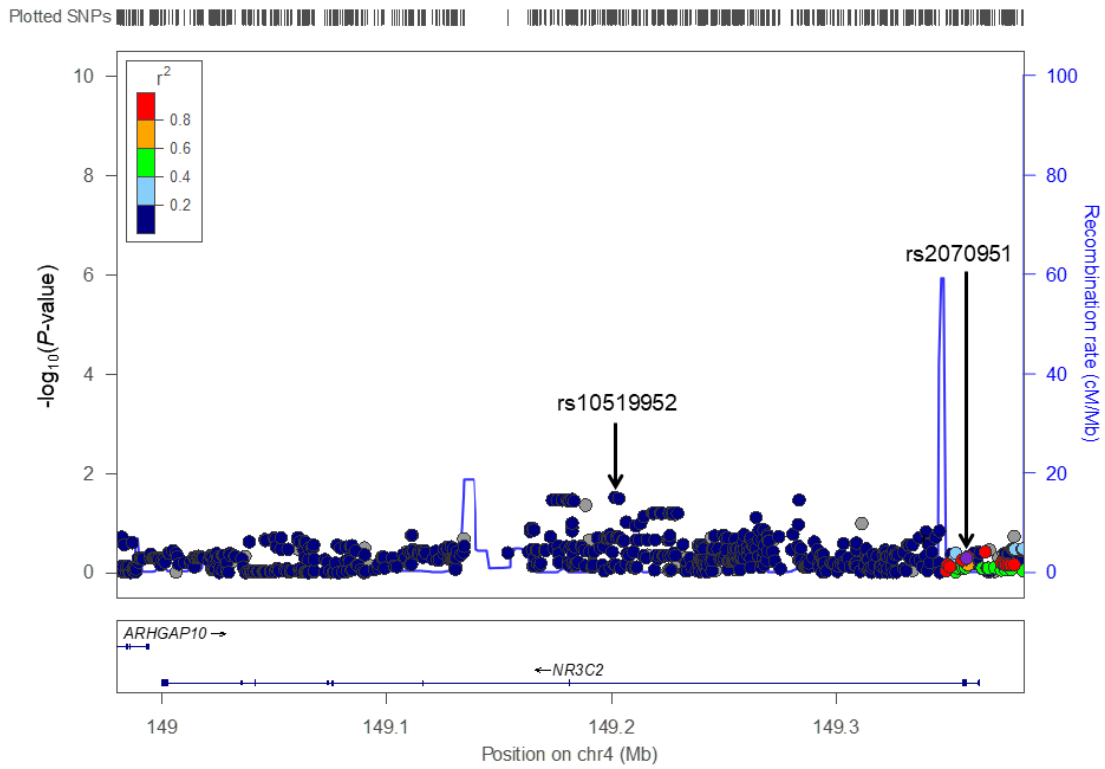

**Supplementary Figure 3: Regional association plots for genotyped single nucleotide polymorphisms in the *CDH5* region.** Plots represented using the  $-\log_{10}(P\text{-values})$  obtained from the first-stage genome-wide association study. Each  $P$ -value was calculated by age-, sex-, axial length and the first principal component-adjusted quantitative trait locus analysis.

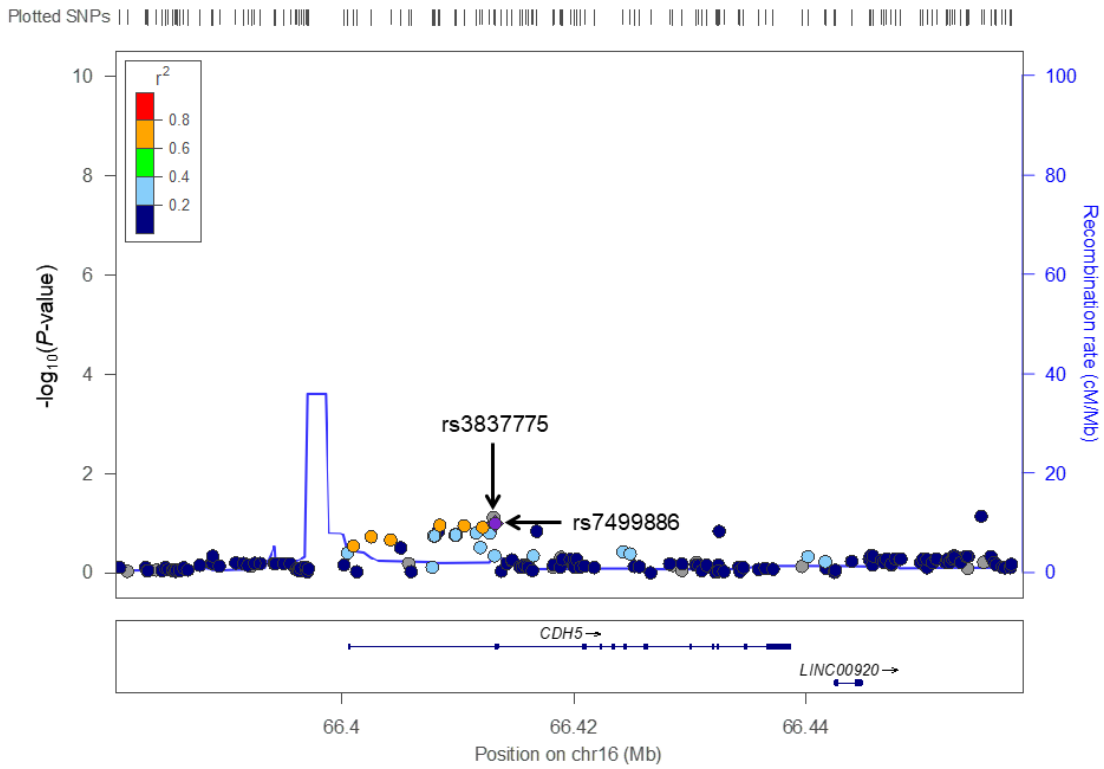

**Supplementary Figure 4: Flow diagram summarizing the participants included in the discovery GWAS.** SNP, single nucleotide polymorphism; EDI, enhanced depth imaging; OCT, optical coherence tomography.

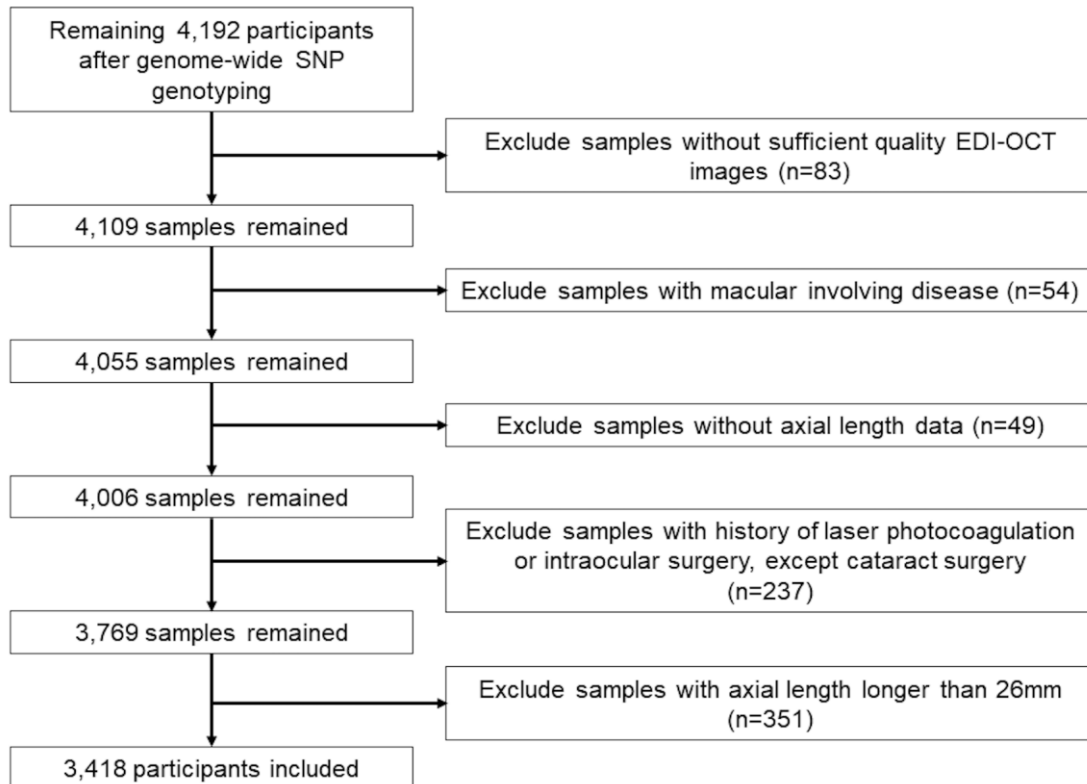

### Supplementary Table 1. Description of the cohort

| Stage       | N     | Female (%)   | Age (years)     | SFCT ( $\mu\text{m}$ ) | AL (mm)          |
|-------------|-------|--------------|-----------------|------------------------|------------------|
| Discovery   | 3,418 | 2,373 (69.4) | 57.8 $\pm$ 13.1 | 296.2 $\pm$ 100.5      | 23.79 $\pm$ 1.02 |
| Replication | 2,692 | 1,847 (68.6) | 59.9 $\pm$ 12.0 | 293.0 $\pm$ 98.6       | 23.72 $\pm$ 1.02 |

AL, axial length; SFCT, subfoveal choroidal thickness. Data are expressed as mean  $\pm$  standard deviation.

**Supplementary Table 2. Associations between *NR3C2* and *CDH5* with choroidal thickness in the discovery stage**

| SNP        | Gene         | CHR | Position  | N     | Effect allele<br>(indel) | $\beta$ | Standard error | MAF   | $P^a$                    |
|------------|--------------|-----|-----------|-------|--------------------------|---------|----------------|-------|--------------------------|
| rs10519952 | <i>NR3C2</i> | 4   | 149201414 | 3,418 | G                        | -5.701  | 2.633          | 0.196 | <b>0.030<sup>b</sup></b> |
| rs2070951  | <i>NR3C2</i> | 4   | 149358014 | 3,418 | G                        | -1.628  | 2.457          | 0.252 | 0.51                     |
| rs3837775  | <i>CDH5</i>  | 16  | 66413050  | 3,418 | CG                       | 3.741   | 2.122          | 0.470 | 0.076                    |
| rs7499886  | <i>CDH5</i>  | 16  | 66413195  | 3,418 | G                        | 3.473   | 2.119          | 0.467 | 0.10                     |

CHR, chromosome; MAF, minor allele frequency; SNP, single nucleotide polymorphism.

<sup>a</sup> $P$ -values derived using linear regression.

<sup>b</sup> $P$ -values in bold are statistically significant.

**Supplementary Table 3. Associations between *NR3C2* and *CDH5* with CSC**

| Variant    | Gene         | Major/minor allele (indel) | Minor allele frequency |                | Odds ratio (95% CI) | <i>P</i> <sup>a</sup> |
|------------|--------------|----------------------------|------------------------|----------------|---------------------|-----------------------|
|            |              |                            | Controls<br>N = 3,418  | CSC<br>N = 250 |                     |                       |
| rs10519952 | <i>NR3C2</i> | A/G                        | 0.196                  | 0.19           | 0.96 (0.76-1.21)    | 0.73                  |
| rs2070951  | <i>NR3C2</i> | C/G                        | 0.252                  | 0.238          | 0.93 (0.75-1.15)    | 0.50                  |
| rs3837775  | <i>CDH5</i>  | C/CG                       | 0.470                  | 0.466          | 0.98 (0.82-1.18)    | 0.86                  |
| rs7499886  | <i>CDH5</i>  | A/G                        | 0.467                  | 0.466          | 1.00 (0.83-1.19)    | 0.96                  |

CSC, central serous chorioretinopathy; CI, confidence interval.

<sup>a</sup>*P*-values derived using chi-squared test.

**The NAGAHAMA Study Group.**

Yasuharu Tabara

Takahisa Kawaguchi

Kazuya Setoh

Yoshimitsu Takahashi

Shinji Kosugi

Takeo Nakayama

Fumihiko Matsuda
